# Supplementary material for: DNA methylation of miR-138 regulates cell proliferation and EMT in cervical cancer by targeting EZH2
Source: PubMed Central journal article supplement (PMC9063191; doi:10.1186/s12885-022-09477-5), 2022-05-03
Supplement: 12885_2022_9477_MOESM4_ESM.pdf [file 12885_2022_9477_MOESM4_ESM.pdf]

a

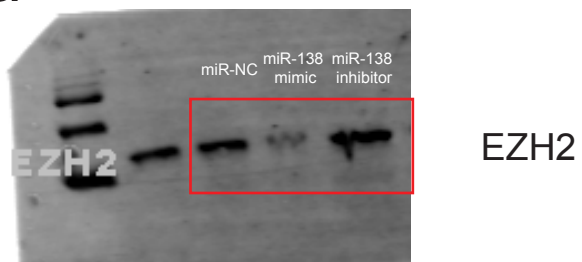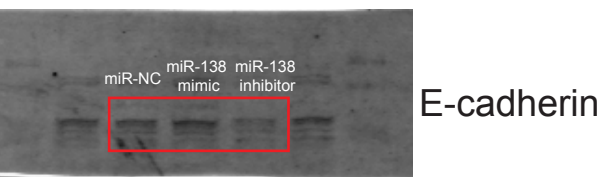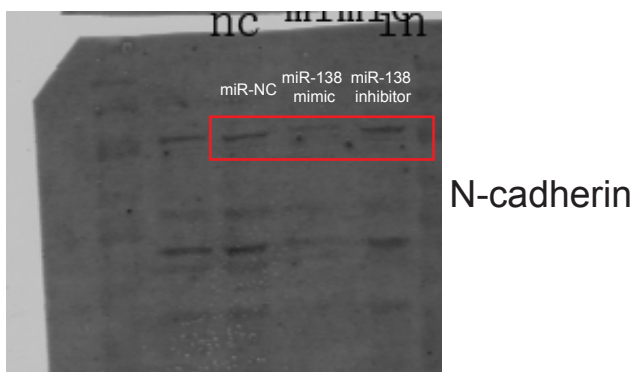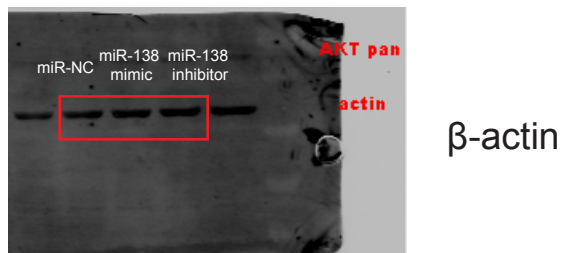

Siha

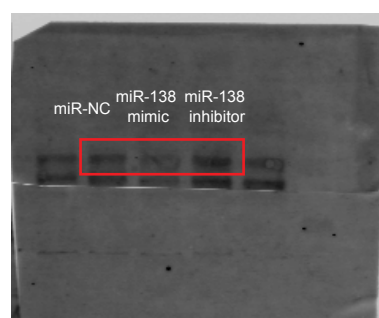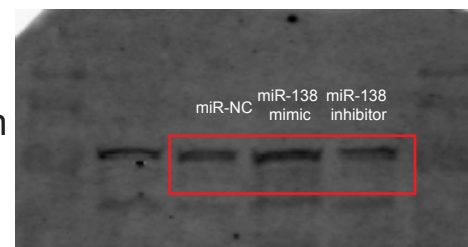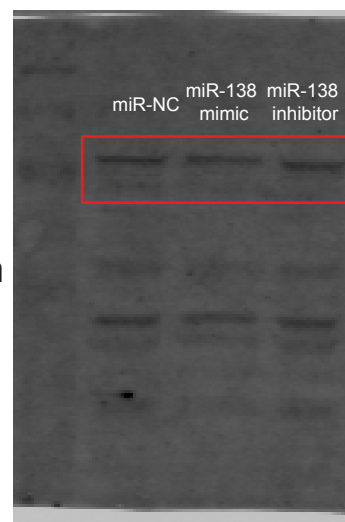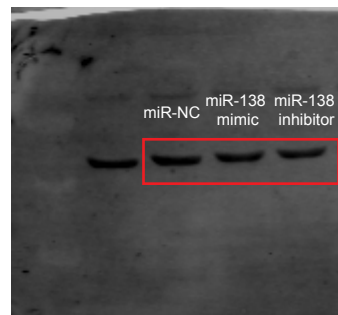

C33A

b

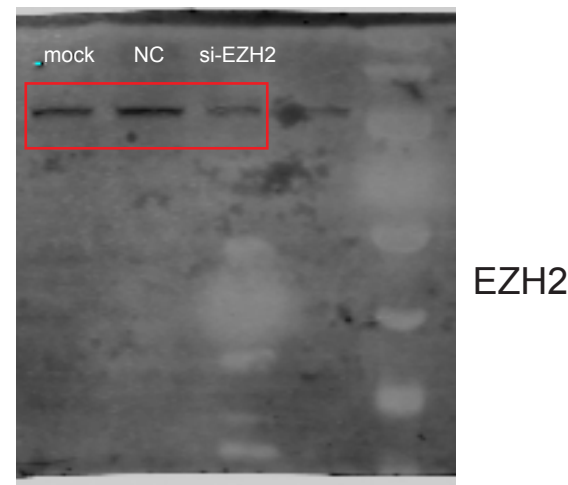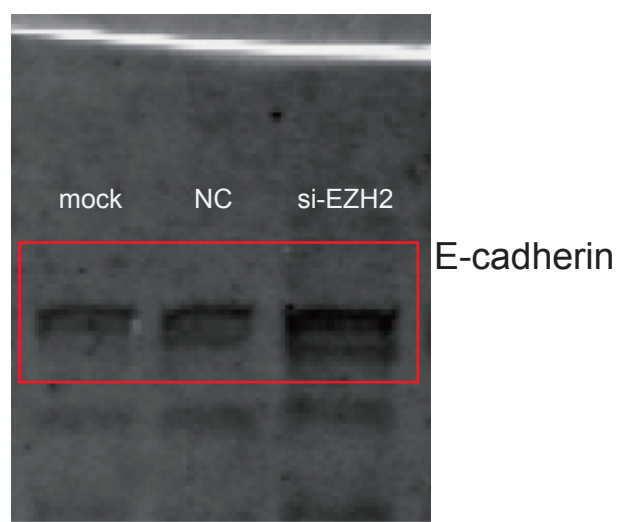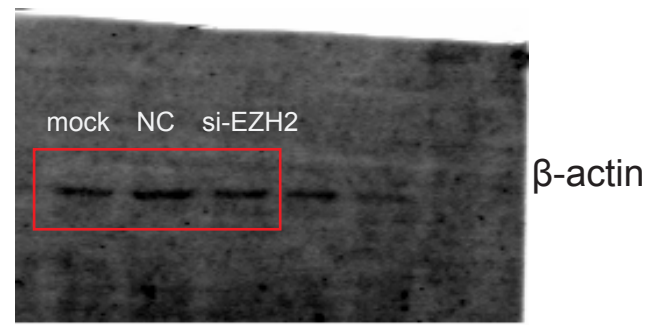

Siha

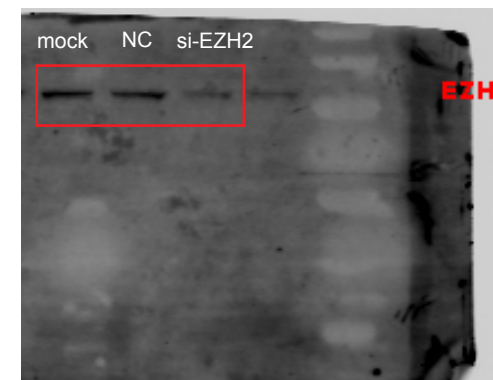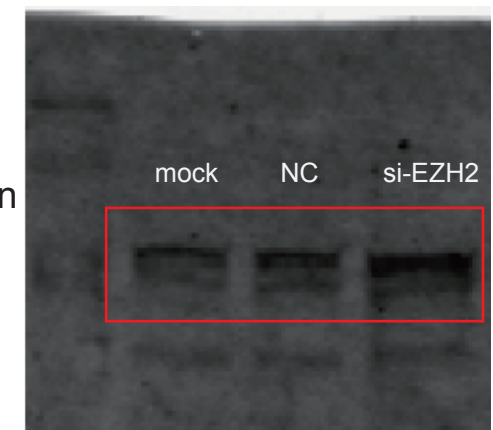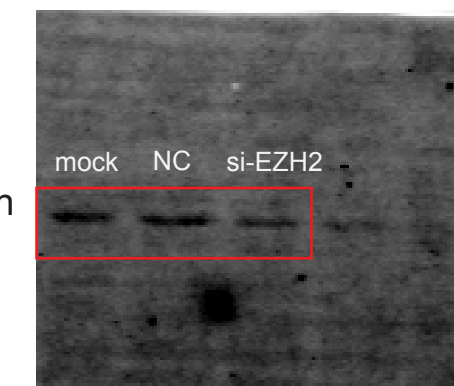

C33A
